# Supplementary material for: NUSAP1 Binds ILF2 to Modulate R-Loop Accumulation and DNA Damage in Prostate Cancer
Source: MDPI journal article supplement (doi:10.3390/ijms24076258), 2023-03-26
Supplement: s1 [file s1]

**Table S4** NUSAP1 and ILF2 interactomes- 8 common interactors

| Gene_Name     | Protein_Name                                           |
|---------------|--------------------------------------------------------|
| <i>DHX9</i>   | DEAH box protein 9 (DHX9)                              |
| <i>ILF2</i>   | Interleukin enhancer-binding factor 2 (ILF2)           |
| <i>ILF3</i>   | Interleukin enhancer-binding factor 3 (ILF3)           |
| <i>HNRNPC</i> | Heterogeneous nuclear ribonucleoproteins C1/C2 (HNRPC) |
| <i>RALY</i>   | RNA-binding protein Raly (RALY)                        |
| <i>FUS</i>    | RNA-binding protein FUS (FUS)                          |
| <i>RBMX</i>   | RNA-binding motif protein, X chromosome (RBMX)         |
| <i>YBX3</i>   | Y-box-binding protein 3 (YBOX3)                        |
