# Supplementary material for: NUSAP1 Binds ILF2 to Modulate R-Loop Accumulation and DNA Damage in Prostate Cancer
Source: MDPI journal article supplement (doi:10.3390/ijms24076258), 2023-03-26
Supplement: s1 [file s1]

**Table S2** High-confidence NUSAP1 interactors identified from AP-MS in nocodazole-treated 293T cells

| Gene Name      | Protein Name                                            | Uniprot ID | Spectral Counts | ctrlCounts | SaintScore | BFDR |
|----------------|---------------------------------------------------------|------------|-----------------|------------|------------|------|
| <i>NUSAP1</i>  | Nucleolar and spindle-associated protein 1              | Q9BXS6     | 1090 1584 1197  | 0 0 0      | 1          | 0    |
| <i>RBMX</i>    | RNA-binding motif protein, X chromosome                 | P38159     | 382 359 289     | 19 25 22   | 1          | 0    |
| <i>MKI67</i>   | Proliferation marker protein Ki-67                      | P46013     | 135 117 108     | 0 0 0      | 1          | 0    |
| <i>CHTOP</i>   | Chromatin target of PRMT1 protein                       | Q9Y3Y2     | 47 147 42       | 0 0 0      | 1          | 0    |
| <i>RPL12</i>   | 60S ribosomal protein L12                               | P30050     | 20 51 46        | 1 0 0      | 1          | 0    |
| <i>H1-2</i>    | Histone H1.2                                            | P16403     | 73 159 95       | 8 6 13     | 1          | 0    |
| <i>HP1BP3</i>  | Heterochromatin protein 1-binding protein 3             | Q5SSJ5     | 41 24 40        | 0 0 0      | 1          | 0    |
| <i>STAU1</i>   | Double-stranded RNA-binding protein Staufen homolog 1   | O95793     | 20 18 27        | 0 0 0      | 1          | 0    |
| <i>RPS21</i>   | 40S ribosomal protein S21                               | P63220     | 57 27 21        | 0 1 2      | 1          | 0    |
| <i>IGF2BP1</i> | Insulin-like growth factor 2 mRNA-binding protein 1     | Q9NZI8     | 28 13 21        | 0 0 0      | 1          | 0    |
| <i>RPL21</i>   | 60S ribosomal protein L21                               | P46778     | 25 37 33        | 3 3 4      | 1          | 0    |
| <i>THOC4</i>   | THO complex subunit 4                                   | Q86V81     | 29 25 25        | 5 1 3      | 1          | 0    |
| <i>RPS20</i>   | 40S ribosomal protein S20                               | P60866     | 16 21 18        | 2 0 1      | 1          | 0    |
| <i>WTAP</i>    | Pre-mRNA-splicing regulator WTAP                        | Q15007     | 10 24 22        | 0 0 0      | 1          | 0    |
| <i>EIF6</i>    | Eukaryotic translation initiation factor 6              | P56537     | 12 10 16        | 0 0 0      | 1          | 0    |
| <i>HNRNPA0</i> | Heterogeneous nuclear ribonucleoprotein A0              | Q13151     | 9 25 13         | 0 0 0      | 1          | 0    |
| <i>RPL28</i>   | 60S ribosomal protein L28                               | P46779     | 42 53 48        | 0 5 2      | 1          | 0    |
| <i>HNRNPC</i>  | Heterogeneous nuclear ribonucleoproteins C1/C2          | P07910     | 22 14 8         | 0 0 0      | 1          | 0    |
| <i>PAIRBP1</i> | Plasminogen activator inhibitor 1 RNA-binding protein 1 | Q8NC51     | 7 19 11         | 0 0 0      | 1          | 0    |
| <i>MRPS28</i>  | 28S ribosomal protein S28                               | Q9Y2Q9     | 8 7 9           | 0 0 0      | 1          | 0    |

|                 |                                                                |        |           |          |   |   |
|-----------------|----------------------------------------------------------------|--------|-----------|----------|---|---|
| <i>GAR1</i>     | H/ACA ribonucleoprotein complex subunit 1                      | Q9NY12 | 6 9 9     | 0 0 1    | 1 | 0 |
| <i>RPL35A</i>   | 60S ribosomal protein L35a                                     | P18077 | 7 9 6     | 0 0 1    | 1 | 0 |
| <i>RPS28</i>    | 40S ribosomal protein S28                                      | P62857 | 14 26 18  | 3 1 1    | 1 | 0 |
| <i>NOP10</i>    | H/ACA ribonucleoprotein complex subunit 3                      | Q9NPE3 | 6 7 10    | 0 0 0    | 1 | 0 |
| <i>RPS14</i>    | 40S ribosomal protein S14                                      | P62263 | 60 161 56 | 18 23 15 | 1 | 0 |
| <i>RPS11</i>    | 40S ribosomal protein S11                                      | P62280 | 23 21 16  | 0 3 3    | 1 | 0 |
| <i>CCDC137</i>  | Coiled-coil domain-containing protein 137                      | Q6PK04 | 8 13 5    | 0 0 0    | 1 | 0 |
| <i>KPNA2</i>    | Importin subunit alpha-1                                       | P52292 | 5 10 10   | 0 0 0    | 1 | 0 |
| <i>PINX1</i>    | PIN2/TERF1-interacting telomerase inhibitor 1                  | Q96BK5 | 5 31 28   | 0 0 0    | 1 | 0 |
| <i>RPL22</i>    | 60S ribosomal protein L22                                      | P35268 | 12 7 5    | 0 0 0    | 1 | 0 |
| <i>DPY30</i>    | Protein dpy-30 homolog                                         | Q9C005 | 4 7 8     | 0 0 0    | 1 | 0 |
| <i>RPLP0P6</i>  | 60S acidic ribosomal protein P0-like                           | Q8NHW5 | 14 4 6    | 0 0 0    | 1 | 0 |
| <i>FUS</i>      | RNA-binding protein FUS                                        | P35637 | 12 23 20  | 3 3 1    | 1 | 0 |
| <i>CBX1</i>     | Chromobox protein homolog 1                                    | P83916 | 3 3 6     | 0 0 0    | 1 | 0 |
| <i>C11orf98</i> | Uncharacterized protein C11orf98                               | E9PRG8 | 6 4 3     | 0 0 0    | 1 | 0 |
| <i>H1-0</i>     | Histone H1.0                                                   | P07305 | 3 9 5     | 0 0 0    | 1 | 0 |
| <i>NHP2</i>     | H/ACA ribonucleoprotein complex subunit 2                      | Q9NX24 | 3 12 6    | 0 0 0    | 1 | 0 |
| <i>NOL7</i>     | Nucleolar protein 7                                            | Q9UMY1 | 7 3 4     | 0 0 0    | 1 | 0 |
| <i>MRPL54</i>   | 39S ribosomal protein L54                                      | Q6P161 | 3 4 4     | 0 0 0    | 1 | 0 |
| <i>RPS12</i>    | 40S ribosomal protein S12                                      | P25398 | 15 6 3    | 0 0 0    | 1 | 0 |
| <i>MRPS17</i>   | 28S ribosomal protein S17                                      | Q9Y2R5 | 13 3 5    | 0 0 0    | 1 | 0 |
| <i>TIMM8B</i>   | Mitochondrial import inner membrane translocase subunit Tim8 B | Q9Y5J9 | 3 7 6     | 0 0 0    | 1 | 0 |
| <i>ZNF48</i>    | Zinc finger protein 48                                         | Q96MX3 | 3 8 5     | 0 0 0    | 1 | 0 |

|                 |                                                  |        |          |       |      |      |
|-----------------|--------------------------------------------------|--------|----------|-------|------|------|
| <i>RPL36A</i>   | 60S ribosomal protein L36a                       | P83881 | 13 13 11 | 0 3 0 | 0.99 | 0    |
| <i>RPL34</i>    | 60S ribosomal protein L34                        | P49207 | 7 7 8    | 0 2 0 | 0.99 | 0    |
| <i>H2AV</i>     | Histone H2A.V                                    | Q71UI9 | 25 14 11 | 0 4 2 | 0.99 | 0    |
| <i>HNRNPCL1</i> | Heterogeneous nuclear ribonucleoprotein C-like 1 | O60812 | 11 19 22 | 2 2 5 | 0.99 | 0    |
| <i>HAKAI</i>    | E3 ubiquitin-protein ligase Hakai                | Q75N03 | 2 16 15  | 0 0 0 | 0.99 | 0    |
| <i>NHP2L1</i>   | NHP2-like protein 1                              | P55769 | 2 6 3    | 0 0 0 | 0.99 | 0    |
| <i>RPL30</i>    | 60S ribosomal protein L30                        | P62888 | 2 2 3    | 0 0 0 | 0.99 | 0    |
| <i>RPLP0</i>    | 60S acidic ribosomal protein P0                  | P05388 | 7 2 7    | 0 0 0 | 0.99 | 0    |
| <i>YBX3</i>     | Y-box-binding protein 3                          | P16989 | 7 4 2    | 0 0 0 | 0.99 | 0    |
| <i>RPLP1</i>    | 60S acidic ribosomal protein P1                  | P05386 | 8 10 8   | 2 2 2 | 0.98 | 0    |
| <i>RPL31</i>    | 60S ribosomal protein L31                        | P62899 | 11 23 18 | 2 3 5 | 0.99 | 0    |
| <i>CBX3</i>     | Chromobox protein homolog 3                      | Q13185 | 11 10 14 | 0 4 4 | 0.96 | 0    |
| <i>CCDC86</i>   | Coiled-coil domain-containing protein 86         | Q9H6F5 | 4 2 3    | 0 0 1 | 0.95 | 0    |
| <i>RPS26</i>    | 40S ribosomal protein S26                        | P62854 | 2 2 4    | 0 0 1 | 0.92 | 0    |
| <i>RPL23</i>    | 60S ribosomal protein L23                        | P62829 | 5 10 10  | 0 2 3 | 0.91 | 0    |
| <i>RPL37A</i>   | 60S ribosomal protein L37a                       | P61513 | 15 22 9  | 0 5 4 | 0.9  | 0.01 |
