# Supplementary material for: NUSAP1 Binds ILF2 to Modulate R-Loop Accumulation and DNA Damage in Prostate Cancer
Source: MDPI journal article supplement (doi:10.3390/ijms24076258), 2023-03-26
Supplement: s1 [file s1]

**Table S3** 27 NUSAP1-interacting proteins uniquely identified in the non-synchronized cells

| Gene Name        | Protein Name                                       |
|------------------|----------------------------------------------------|
| <i>MDC1</i>      | Mediator of DNA damage checkpoint protein 1 (MDC1) |
| <i>PSIP1</i>     | PC4 and SFRS1-interacting protein                  |
| <i>ILF3</i>      | Interleukin enhancer-binding factor 3 (ILF3)       |
| <i>DHX9</i>      | DEAH box protein 9 (DHX9)                          |
| <i>RALY</i>      | RNA-binding protein Raly (RALY)                    |
| <i>CIRBP</i>     | Cold-inducible RNA-binding protein                 |
| <i>NUPL2</i>     | Nucleoporin-like protein 2                         |
| <i>RPS29</i>     | 40S ribosomal protein S29                          |
| <i>RPL23A</i>    | 60S ribosomal protein L23a                         |
| <i>RPL7A</i>     | 60S ribosomal protein L7a                          |
| <i>PHC2</i>      | Polyhomeotic-like protein 2                        |
| <i>NUMA1</i>     | Nuclear mitotic apparatus protein 1                |
| <i>RRP15</i>     | RRP15-like protein                                 |
| <i>SRP14</i>     | Signal recognition particle 14 kDa protein         |
| <i>ZC3H8</i>     | Zinc finger CCCH domain-containing protein 8       |
| <i>RPS10L</i>    | Putative 40S ribosomal protein S10-like            |
| <i>H1-10</i>     | Histone H1.10                                      |
| <i>ILF2</i>      | Interleukin enhancer-binding factor 2 (ILF2)       |
| <i>RALYL</i>     | RNA-binding Raly-like protein                      |
| <i>RBMXL1</i>    | RNA binding motif protein, X-linked-like-1 (RMLX1) |
| <i>RRP12</i>     | RRP12-like protein                                 |
| <i>SAP30BP</i>   | SAP30-binding protein                              |
| <i>ZNF346</i>    | Zinc finger protein 346                            |
| <i>RPS16</i>     | 40S ribosomal protein S16                          |
| <i>RPL29</i>     | 60S ribosomal protein L29                          |
| <i>HIST2H2AA</i> | Histone H2A type 2-A                               |
| <i>RPL8</i>      | 60S ribosomal protein L8                           |
