# Supplementary material for: NUSAP1 Binds ILF2 to Modulate R-Loop Accumulation and DNA Damage in Prostate Cancer
Source: MDPI journal article supplement (doi:10.3390/ijms24076258), 2023-03-26
Supplement: s1 [file s1]

**Table S5** NUSAP1 and RNA:DNA Hybrids interactomes- 33 common interactors

| Gene Name        | Protein Name                                             |
|------------------|----------------------------------------------------------|
| <i>RBMX</i>      | RNA-binding motif protein, X chromosome                  |
| <i>MKI67</i>     | Proliferation marker protein Ki-67                       |
| <i>HP1BP3</i>    | Heterochromatin protein 1-binding protein 3              |
| <i>CHTOP</i>     | Chromatin target of PRMT1 protein                        |
| <i>STAU1</i>     | Double-stranded RNA-binding protein Staufen homolog 1    |
| <i>PSIP1</i>     | PC4 and SFRS1-interacting protein                        |
| <i>CCDC86</i>    | Coiled-coil domain-containing protein 86                 |
| <i>IGF2BP1</i>   | Insulin-like growth factor 2 mRNA-binding protein 1      |
| <i>PINX1</i>     | PIN2/TERF1-interacting telomerase inhibitor 1            |
| <i>HNRNPA0</i>   | Heterogeneous nuclear ribonucleoprotein A0               |
| <i>ILF3</i>      | Interleukin enhancer-binding factor 3                    |
| <i>CCDC137</i>   | Coiled-coil domain-containing protein 137                |
| <i>EIF6</i>      | Eukaryotic translation initiation factor 6               |
| <i>PAIRBP1</i>   | Plasminogen activator inhibitor 1 RNA-binding protein 1  |
| <i>DHX9</i>      | DEAH box protein 9 (ATP-dependent RNA helicase A) (DHX9) |
| <i>GAR1</i>      | H/ACA ribonucleoprotein complex subunit 1                |
| <i>RALY</i>      | RNA-binding protein Raly                                 |
| <i>FUS</i>       | RNA-binding protein FUS                                  |
| <i>NOL7</i>      | Nucleolar protein 7                                      |
| <i>NOP10</i>     | H/ACA ribonucleoprotein complex subunit 3                |
| <i>THOC4</i>     | THO complex subunit 4                                    |
| <i>HNRNPCL1</i>  | Heterogeneous nuclear ribonucleoprotein C-like 1         |
| <i>NHP2</i>      | H/ACA ribonucleoprotein complex subunit 2                |
| <i>CBX3</i>      | Chromobox protein homolog 3                              |
| <i>NUMA1</i>     | Nuclear mitotic apparatus protein 1                      |
| <i>RRP15</i>     | RRP15-like protein                                       |
| <i>SRP14</i>     | Signal recognition particle 14 kDa protein               |
| <i>HNRNPC</i>    | Heterogeneous nuclear ribonucleoproteins C1/C2 (HNRPC)   |
| <i>ILF2</i>      | Interleukin enhancer-binding factor 2 (ILF2)             |
| <i>RBMXL1</i>    | RNA binding motif protein, X-linked-like-1               |
| <i>RRP12</i>     | RRP12-like protein                                       |
| <i>YBX3</i>      | Y-box-binding protein 3                                  |
| <i>HIST2H2AA</i> | Histone H2A type 2-A                                     |
