# Supplementary material for: NUSAP1 Binds ILF2 to Modulate R-Loop Accumulation and DNA Damage in Prostate Cancer
Source: MDPI journal article supplement (doi:10.3390/ijms24076258), 2023-03-26
Supplement: s1 [file s1]

**Table S1** High-confidence NUSAP1 interactors from AP-MS in vehicle-treated non-synchronized 293T cells

| Gene Name      | Protein Name                                          | Uniprot ID | Spectral Counts | ctrlCounts | SaintScore | BFDR |
|----------------|-------------------------------------------------------|------------|-----------------|------------|------------|------|
| <i>NUSAP1</i>  | Nucleolar and spindle-associated protein 1            | Q9BXS6     | 1070 1070 1055  | 0 0 0      | 1          | 0    |
| <i>RBMX</i>    | RNA-binding motif protein, X chromosome               | P38159     | 415 415 262     | 19 25 22   | 1          | 0    |
| <i>MDC1</i>    | Mediator of DNA damage checkpoint protein 1           | Q14676     | 66 66 73        | 0 0 0      | 1          | 0    |
| <i>MKI67</i>   | Proliferation marker protein Ki-67                    | P46013     | 91 91 59        | 0 0 0      | 1          | 0    |
| <i>HP1BP3</i>  | Heterochromatin protein 1-binding protein 3           | Q5SSJ5     | 54 54 55        | 0 0 0      | 1          | 0    |
| <i>RPL12</i>   | 60S ribosomal protein L12                             | P30050     | 27 27 23        | 1 0 0      | 1          | 0    |
| <i>WTAP</i>    | Pre-mRNA-splicing regulator WTAP                      | Q15007     | 64 64 43        | 0 0 0      | 1          | 0    |
| <i>CHTOP</i>   | Chromatin target of PRMT1 protein                     | Q9Y3Y2     | 35 35 42        | 0 0 0      | 1          | 0    |
| <i>STAU1</i>   | Double-stranded RNA-binding protein Staufen homolog 1 | O95793     | 43 43 33        | 0 0 0      | 1          | 0    |
| <i>PSIP1</i>   | PC4 and SFRS1-interacting protein                     | O75475     | 39 39 26        | 0 0 0      | 1          | 0    |
| <i>CCDC86</i>  | Coiled-coil domain-containing protein 86              | Q9H6F5     | 13 13 16        | 0 0 1      | 1          | 0    |
| <i>IGF2BP1</i> | Insulin-like growth factor 2 mRNA-binding protein 1   | Q9NZI8     | 21 21 21        | 0 0 0      | 1          | 0    |
| <i>PINX1</i>   | PIN2/TERF1-interacting telomerase inhibitor 1         | Q96BK5     | 29 29 19        | 0 0 0      | 1          | 0    |
| <i>RPS20</i>   | 40S ribosomal protein S20                             | P60866     | 25 25 27        | 2 0 1      | 1          | 0    |
| <i>RPS21</i>   | 40S ribosomal protein S21                             | P63220     | 25 25 58        | 0 1 2      | 1          | 0    |
| <i>RPL21</i>   | 60S ribosomal protein L21                             | P46778     | 34 34 36        | 3 3 4      | 1          | 0    |
| <i>HNRNPA0</i> | Heterogeneous nuclear ribonucleoprotein A0            | Q13151     | 17 17 19        | 0 0 0      | 1          | 0    |
| <i>ILF3</i>    | Interleukin enhancer-binding factor 3                 | Q12906     | 43 43 80        | 2 0 0      | 1          | 0    |

|                 |                                                         |        |          |        |   |   |
|-----------------|---------------------------------------------------------|--------|----------|--------|---|---|
| <i>CCDC137</i>  | Coiled-coil domain-containing protein 137               | Q6PK04 | 17 17 15 | 0 0 0  | 1 | 0 |
| <i>H1-2</i>     | Histone H1.2                                            | P16403 | 99 99 50 | 8 6 13 | 1 | 0 |
| <i>EIF6</i>     | Eukaryotic translation initiation factor 6              | P56537 | 22 22 14 | 0 0 0  | 1 | 0 |
| <i>HAKAI</i>    | E3 ubiquitin-protein ligase Hakai                       | Q75N03 | 13 13 13 | 0 0 0  | 1 | 0 |
| <i>PAIRBP1</i>  | Plasminogen activator inhibitor 1 RNA-binding protein 1 | Q8NC51 | 14 14 13 | 0 0 0  | 1 | 0 |
| <i>DHX9</i>     | DEAH box protein 9 (ATP-dependent RNA helicase A)       | Q08211 | 9 9 45   | 0 1 0  | 1 | 0 |
| <i>DPY30</i>    | Protein dpy-30 homolog                                  | Q9C005 | 17 17 12 | 0 0 0  | 1 | 0 |
| <i>GAR1</i>     | H/ACA ribonucleoprotein complex subunit 1               | Q9NY12 | 8 8 11   | 0 0 1  | 1 | 0 |
| <i>RALY</i>     | RNA-binding protein Raly                                | Q9UKM9 | 9 9 20   | 0 0 0  | 1 | 0 |
| <i>FUS</i>      | RNA-binding protein FUS                                 | P35637 | 23 23 19 | 3 3 1  | 1 | 0 |
| <i>CIRBP</i>    | Cold-inducible RNA-binding protein                      | Q14011 | 12 12 8  | 0 0 0  | 1 | 0 |
| <i>NOL7</i>     | Nucleolar protein 7                                     | Q9UMY1 | 8 8 10   | 0 0 0  | 1 | 0 |
| <i>NOP10</i>    | H/ACA ribonucleoprotein complex subunit 3               | Q9NPE3 | 9 9 8    | 0 0 0  | 1 | 0 |
| <i>NUPL2</i>    | Nucleoporin-like protein 2                              | O15504 | 8 8 15   | 0 0 0  | 1 | 0 |
| <i>RPS29</i>    | 40S ribosomal protein S29                               | P62273 | 7 7 7    | 0 0 0  | 1 | 0 |
| <i>THOC4</i>    | THO complex subunit 4                                   | Q86V81 | 25 25 20 | 5 1 3  | 1 | 0 |
| <i>RPS11</i>    | 40S ribosomal protein S11                               | P62280 | 19 19 18 | 0 3 3  | 1 | 0 |
| <i>CBX1</i>     | Chromobox protein homolog 1                             | P83916 | 6 6 7    | 0 0 0  | 1 | 0 |
| <i>H1-0</i>     | Histone H1.0                                            | P07305 | 6 6 6    | 0 0 0  | 1 | 0 |
| <i>RPL31</i>    | 60S ribosomal protein L31                               | P62899 | 22 22 18 | 2 3 5  | 1 | 0 |
| <i>RPL23A</i>   | 60S ribosomal protein L23a                              | P62750 | 24 24 26 | 4 8 6  | 1 | 0 |
| <i>RPLP1</i>    | 60S acidic ribosomal protein P1                         | P05386 | 14 14 18 | 2 2 2  | 1 | 0 |
| <i>HNRNPCL1</i> | Heterogeneous nuclear ribonucleoprotein C-like 1        | O60812 | 21 21 16 | 2 2 5  | 1 | 0 |

|                 |                                                                |        |          |        |      |   |
|-----------------|----------------------------------------------------------------|--------|----------|--------|------|---|
| <i>C11orf98</i> | Uncharacterized protein C11orf98                               | E9PRG8 | 5 5 6    | 0 0 0  | 1    | 0 |
| <i>TIMM8B</i>   | Mitochondrial import inner membrane translocase subunit Tim8 B | Q9Y5J9 | 7 7 5    | 0 0 0  | 1    | 0 |
| <i>RPL7A</i>    | 60S ribosomal protein L7a                                      | P62424 | 35 35 38 | 4 12 8 | 1    | 0 |
| <i>RPL28</i>    | 60S ribosomal protein L28                                      | P46779 | 25 25 27 | 0 5 2  | 1    | 0 |
| <i>NHP2</i>     | H/ACA ribonucleoprotein complex subunit 2                      | Q9NX24 | 4 4 6    | 0 0 0  | 1    | 0 |
| <i>PHC2</i>     | Polyhomeotic-like protein 2                                    | Q8IXK0 | 4 4 5    | 0 0 0  | 1    | 0 |
| <i>MRPS17</i>   | 28S ribosomal protein S17                                      | Q9Y2R5 | 4 4 10   | 0 0 0  | 1    | 0 |
| <i>MRPS28</i>   | 28S ribosomal protein S28                                      | Q9Y2Q9 | 4 4 4    | 0 0 0  | 1    | 0 |
| <i>RPL36A</i>   | 60S ribosomal protein L36a                                     | P83881 | 17 17 19 | 0 3 0  | 1    | 0 |
| <i>RPL35A</i>   | 60S ribosomal protein L35a                                     | P18077 | 5 5 4    | 0 0 1  | 1    | 0 |
| <i>CBX3</i>     | Chromobox protein homolog 3                                    | Q13185 | 16 16 20 | 0 4 4  | 1    | 0 |
| <i>NUMA1</i>    | Nuclear mitotic apparatus protein 1                            | Q14980 | 14 14 3  | 0 0 0  | 1    | 0 |
| <i>RPL22</i>    | 60S ribosomal protein L22                                      | P35268 | 7 7 3    | 0 0 0  | 1    | 0 |
| <i>RPLP0</i>    | 60S acidic ribosomal protein P0                                | P05388 | 3 3 13   | 0 0 0  | 1    | 0 |
| <i>RRP15</i>    | RRP15-like protein                                             | Q9Y3B9 | 7 7 3    | 0 0 0  | 1    | 0 |
| <i>RPS12</i>    | 40S ribosomal protein S12                                      | P25398 | 6 6 3    | 0 0 0  | 1    | 0 |
| <i>SRP14</i>    | Signal recognition particle 14 kDa protein                     | P37108 | 3 3 3    | 0 0 0  | 1    | 0 |
| <i>ZC3H8</i>    | Zinc finger CCCH domain-containing protein 8                   | Q8N5P1 | 3 3 3    | 0 0 0  | 1    | 0 |
| <i>RPS10L</i>   | Putative 40S ribosomal protein S10-like                        | Q9NQ39 | 17 17 24 | 4 4 7  | 1    | 0 |
| <i>HNRNPC</i>   | Heterogeneous nuclear ribonucleoproteins C1/C2                 | P07910 | 21 21 33 | 6 0 0  | 1    | 0 |
| <i>H1-10</i>    | Histone H1.10                                                  | Q92522 | 19 19 17 | 0 5 5  | 1    | 0 |
| <i>RPL34</i>    | 60S ribosomal protein L34                                      | P49207 | 7 7 7    | 0 2 0  | 0.99 | 0 |
| <i>H2AV</i>     | Histone H2A.V                                                  | Q71UI9 | 12 12 11 | 0 4 2  | 0.99 | 0 |
| <i>RPS26</i>    | 40S ribosomal protein S26                                      | P62854 | 3 3 4    | 0 0 1  | 0.99 | 0 |

|                  |                                            |        |          |        |      |   |
|------------------|--------------------------------------------|--------|----------|--------|------|---|
| <i>ILF2</i>      | Interleukin enhancer-binding factor 2      | Q12905 | 2 2 8    | 0 0 0  | 0.99 | 0 |
| <i>KPNA2</i>     | Importin subunit alpha-1                   | P52292 | 2 2 9    | 0 0 0  | 0.99 | 0 |
| <i>RALYL</i>     | RNA-binding Raly-like protein              | Q86SE5 | 2 2 3    | 0 0 0  | 0.99 | 0 |
| <i>RPL30</i>     | 60S ribosomal protein L30                  | P62888 | 4 4 2    | 0 0 0  | 1    | 0 |
| <i>MRPL54</i>    | 39S ribosomal protein L54                  | Q6P161 | 2 2 2    | 0 0 0  | 0.99 | 0 |
| <i>RBMXL1</i>    | RNA binding motif protein, X-linked-like-1 | Q96E39 | 2 2 5    | 0 0 0  | 0.99 | 0 |
| <i>RRP12</i>     | RRP12-like protein                         | Q5JTH9 | 3 3 2    | 0 0 0  | 0.99 | 0 |
| <i>SAP30BP</i>   | SAP30-binding protein                      | Q9UHR5 | 2 2 4    | 0 0 0  | 0.99 | 0 |
| <i>YBX3</i>      | Y-box-binding protein 3                    | P16989 | 7 7 2    | 0 0 0  | 1    | 0 |
| <i>ZNF346</i>    | Zinc finger protein 346                    | Q9UL40 | 4 4 2    | 0 0 0  | 1    | 0 |
| <i>ZNF48</i>     | Zinc finger protein 48                     | Q96MX3 | 11 11 2  | 0 0 0  | 1    | 0 |
| <i>RPL23</i>     | 60S ribosomal protein L23                  | P62829 | 8 8 9    | 0 2 3  | 0.99 | 0 |
| <i>RPS16</i>     | 40S ribosomal protein S16                  | P62249 | 11 11 17 | 2 4 4  | 0.98 | 0 |
| <i>RPS28</i>     | 40S ribosomal protein S28                  | P62857 | 19 19 6  | 3 1 1  | 0.98 | 0 |
| <i>RPL29</i>     | 60S ribosomal protein L29                  | P47914 | 29 29 26 | 17 2 1 | 0.95 | 0 |
| <i>HIST2H2AA</i> | Histone H2A type 2-A                       | Q6FI13 | 3 3 5    | 0 1 1  | 0.92 | 0 |
| <i>RPL8</i>      | 60S ribosomal protein L8                   | P62917 | 21 21 13 | 4 8 1  | 0.91 | 0 |
